# Supplementary material for: Global Distribution of Panton-Valentine Leukocidin–positive Methicillin-resistant Staphylococcus aureus, 2006
Source: PubMed Central journal article supplement (PMC2725977; doi:10.3201/eid1304.061316), 2007-04
Supplement: 06-1316_appT-s1.pdf [file 06-1316_appT-s1.pdf]

Appendix Table. Antimicrobial resistance profile of PVL-positive CA-MRSA clone\*

| <i>agr</i> type | ST    | N (%)      | Antimicrobial resistance profile                                                                                                                                                                                                                                                                                                                                                                                                                                                                                                                                                                                                         | N (%)                                                                                                                                                                                                                                                                                                                                    | Countries of detection (N)                                                                                                                                                                                                                                                                                                                                                                                                                                                                                                                                                                                                                                                                       |
|-----------------|-------|------------|------------------------------------------------------------------------------------------------------------------------------------------------------------------------------------------------------------------------------------------------------------------------------------------------------------------------------------------------------------------------------------------------------------------------------------------------------------------------------------------------------------------------------------------------------------------------------------------------------------------------------------------|------------------------------------------------------------------------------------------------------------------------------------------------------------------------------------------------------------------------------------------------------------------------------------------------------------------------------------------|--------------------------------------------------------------------------------------------------------------------------------------------------------------------------------------------------------------------------------------------------------------------------------------------------------------------------------------------------------------------------------------------------------------------------------------------------------------------------------------------------------------------------------------------------------------------------------------------------------------------------------------------------------------------------------------------------|
| <i>agr1</i>     |       | 46 (9.8)   |                                                                                                                                                                                                                                                                                                                                                                                                                                                                                                                                                                                                                                          |                                                                                                                                                                                                                                                                                                                                          |                                                                                                                                                                                                                                                                                                                                                                                                                                                                                                                                                                                                                                                                                                  |
|                 | ST8   | 25 (54.3)  | P, OX<br>P, OX, K<br>P, OX, TE<br><br>P, OX, K, E<br>P, OX, E, OFL<br>P, OX, K, TE<br>P, OX, K, E, OFL<br>P, OX, K, E, TE<br>P, OX, K, E, TE, OFL<br>P, OX, K, E, L, TE, MU<br>P, OX, K, E, L, OFL, MU                                                                                                                                                                                                                                                                                                                                                                                                                                   | 8 (32.0)<br>1 (4.0)<br>3 (12.0)<br><br>6 (24.0)<br>1 (4.0)<br>1 (4.0)<br>1 (4.0)<br>1 (4.0)<br>1 (4.0)<br>1 (4.0)<br>1 (4.0)<br>1 (4.0)                                                                                                                                                                                                  | Spain (2), Switzerland (2), United States (3), France (1)<br>Switzerland (1)<br>Spain (1), the Netherlands (2)<br>France (1), the Netherlands (2), US (2)<br>France (1)<br>French Polynesia (1)<br>US (1)<br>Switzerland (1)<br>Switzerland (1)<br>The Netherlands (1)<br>United States (1)<br>France (2), the Netherlands (2), Singapore (1)<br>United States (1)<br>France (1)<br>The Netherlands (2)<br>Germany (1)<br>Singapore (1)                                                                                                                                                                                                                                                          |
|                 | ST59  | 7 (15.2)   | P, OX, K, E, L, TE<br>P, OX                                                                                                                                                                                                                                                                                                                                                                                                                                                                                                                                                                                                              | 5 (71.4)<br>1 (14.3)                                                                                                                                                                                                                                                                                                                     | France (2), the Netherlands (2), Singapore (1)<br>United States (1)                                                                                                                                                                                                                                                                                                                                                                                                                                                                                                                                                                                                                              |
|                 | ST22  | 3 (6.5)    | P, OX, K, T, G, E, L, TE<br>P, OX, K, T, G                                                                                                                                                                                                                                                                                                                                                                                                                                                                                                                                                                                               | 1 (14.3)<br>2 (66.7)                                                                                                                                                                                                                                                                                                                     | France (1)<br>The Netherlands (2)                                                                                                                                                                                                                                                                                                                                                                                                                                                                                                                                                                                                                                                                |
|                 | ST766 | 1 (2.2)    | P, OX, FU                                                                                                                                                                                                                                                                                                                                                                                                                                                                                                                                                                                                                                | 1 (33.3)                                                                                                                                                                                                                                                                                                                                 | Germany (1)                                                                                                                                                                                                                                                                                                                                                                                                                                                                                                                                                                                                                                                                                      |
|                 | ST766 | 1 (2.2)    | P, OX, K, T, G, E, TE, OFL                                                                                                                                                                                                                                                                                                                                                                                                                                                                                                                                                                                                               | 1 (100.0)                                                                                                                                                                                                                                                                                                                                | Singapore (1)                                                                                                                                                                                                                                                                                                                                                                                                                                                                                                                                                                                                                                                                                    |
|                 | ST377 | 10 (21.7)  | P, OX, K, T, G                                                                                                                                                                                                                                                                                                                                                                                                                                                                                                                                                                                                                           | 10 (100.0)                                                                                                                                                                                                                                                                                                                               | The Netherlands (1), France (1), Greece (5), Switzerland (2), Australia (1)                                                                                                                                                                                                                                                                                                                                                                                                                                                                                                                                                                                                                      |
| <i>agr2</i>     |       | 9 (1.9)    |                                                                                                                                                                                                                                                                                                                                                                                                                                                                                                                                                                                                                                          |                                                                                                                                                                                                                                                                                                                                          |                                                                                                                                                                                                                                                                                                                                                                                                                                                                                                                                                                                                                                                                                                  |
|                 | ST5   | 9 (100.0)  | P, OX, TE, FU<br>P, OX, K, T, E, L, TE                                                                                                                                                                                                                                                                                                                                                                                                                                                                                                                                                                                                   | 8 (88.9)<br>1 (11.1)                                                                                                                                                                                                                                                                                                                     | France (3), Switzerland (5)<br>Algeria (1)                                                                                                                                                                                                                                                                                                                                                                                                                                                                                                                                                                                                                                                       |
| <i>agr3</i>     |       | 414 (88.3) |                                                                                                                                                                                                                                                                                                                                                                                                                                                                                                                                                                                                                                          |                                                                                                                                                                                                                                                                                                                                          |                                                                                                                                                                                                                                                                                                                                                                                                                                                                                                                                                                                                                                                                                                  |
|                 | ST80  | 357 (83.2) | P, OX, K<br>P, OX, K, E<br><br>P, OX, K, FU<br>P, OX, K, TE<br>P, OX, K, E, FU<br>P, OX, K, E, L<br>P, OX, K, E, Rif<br>P, OX, K, OFL, FU<br><br>P, OX, K, TE, FU<br><br>P, OX, K, T, G<br>P, OX, K, E, L, FU<br>P, OX, K, E, TE, OFL<br><br>P, OX, K, E, TE, FU<br>P, OX, K, E, L, TE, FU<br>P, OX, K, T, E, L, TE<br>P, OX, K, T, G, OFL, FU<br>P, OX, K, T, G, TE, FU<br>P, OX, K, E, L, TE, OFL, FU<br>P, OX, K, T, G, E, OFL, FU<br>P, OX, K, T, E, L, OFL, FU<br>P, OX, K, T, G, E, TE, FU<br>P, OX, K, T, G, OFL, FU, Rif<br>P, OX, K, T, G, TE, FU, Rif<br>P, OX, K, T, E, L, PRI, OFL, FU<br>P, OX, K, T, G, E, L, PRI, OFL, FU | 25 (7.0)<br>12 (3.4)<br><br>19 (5.3)<br>6 (1.7)<br>8 (2.2)<br>1 (0.3)<br>1 (0.3)<br>1 (0.3)<br><br>205 (57.4)<br><br>1 (0.3)<br>1 (0.3)<br>1 (0.3)<br><br>59 (16.5)<br>2 (0.6)<br>1 (0.3)<br>2 (0.6)<br>1 (0.3)<br>2 (0.6)<br>1 (0.3)<br>1 (0.3)<br>1 (0.3)<br>1 (0.3)<br>1 (0.3)<br>2 (0.6)<br>1 (0.3)<br>2 (0.6)<br>1 (0.3)<br>1 (0.3) | Algeria (9), France (13), Greece (1), Switzerland (2)<br>Algeria (5), France (6), Switzerland (1)<br>Algeria (4), France (13), Switzerland (2)<br>Algeria (1), France (5)<br>France (1)<br>Algeria (1)<br>Algeria (1)<br>Algeria (27), Belgium (1), France (147), Germany (1), Greece (3), The Netherlands (2), Slovenia (3), Switzerland (20), Singapore (1)<br>France (1)<br>France (1)<br>France (1)<br>Algeria (5), France (48), Romania (1), Switzerland (5)<br>France (2)<br>Algeria (1)<br>Algeria (2)<br>Algeria (1)<br>Algeria (2)<br>Algeria (1)<br>Algeria (1)<br>France (1)<br>Algeria (2)<br>Algeria (1)<br>Algeria (2)<br>Algeria (1)<br>Algeria (2)<br>Algeria (1)<br>Algeria (1) |
|                 | ST30  | 20 (4.8)   | P, OX<br><br>P, OX, K, T<br>P, OX, K, T, G, E, L<br>P, OX, K, T, G, E, TE                                                                                                                                                                                                                                                                                                                                                                                                                                                                                                                                                                | 18 (90.0)<br><br>1 (5.0)<br>1 (5.0)<br>1 (100.0)                                                                                                                                                                                                                                                                                         | The Netherlands (1), Australia (8), Japan (1), New-Zealand (4), Western Samoa (1), Switzerland (2), Singapore (1)<br>French Polynesia (1)<br>China (1)<br>The Netherlands (1)                                                                                                                                                                                                                                                                                                                                                                                                                                                                                                                    |
|                 | ST37  | 1 (0.2)    | P, OX                                                                                                                                                                                                                                                                                                                                                                                                                                                                                                                                                                                                                                    | 3 (75.0)                                                                                                                                                                                                                                                                                                                                 | Australia (3)                                                                                                                                                                                                                                                                                                                                                                                                                                                                                                                                                                                                                                                                                    |
|                 | ST93  | 4 (100.0)  | P, OX, E<br>P, OX                                                                                                                                                                                                                                                                                                                                                                                                                                                                                                                                                                                                                        | 1 (25.0)<br>17 (53.1)                                                                                                                                                                                                                                                                                                                    | Australia (1)<br>US (17)                                                                                                                                                                                                                                                                                                                                                                                                                                                                                                                                                                                                                                                                         |
|                 | ST1   | 32 (7.7)   | P, OX, E<br><br>P, OX, TE<br>P, OX, K, T, G                                                                                                                                                                                                                                                                                                                                                                                                                                                                                                                                                                                              | 10 (31.2)<br><br>4 (12.5)<br>1 (3.1)                                                                                                                                                                                                                                                                                                     | US (9), France (1)<br><br>United States (4)<br>Singapore (1)                                                                                                                                                                                                                                                                                                                                                                                                                                                                                                                                                                                                                                     |

Publisher: CDC; Journal: Emerging Infectious Diseases  
Article Type: Research; Volume: 13; Issue: 4; Year: 2007; Article ID: 06-1316  
DOI: 10.3201/eid1304.061316; TOC Head: Research

\*Panton-Valentine leukocidin (PVL); CA-MRSA, community-acquired methicillin-resistant *Staphylococcus aureus*; penicillin (P), oxacillin, (OX), kanamycin (K), tobramycin (T), gentamicin (G), erythromycin (E), lincomycin (L), tetracycline (TE), pristinamycin (PRI), ofloxacin (OFL), fusidic acid (FU), rifampycin (Rif).
